# Supplementary material
Source: publisher figshare collection journal article supplement (https://diabetesjournals.figshare.com/ndownloader/files/30717824)
Supplement: Supplementary file 1 [file 30717824]

**Supplemental Online-Only Materials to Accompany:**

**Diabetes, Drug Treatment and Mortality in COVID-19: A Multinational Retrospective Cohort Study**

\*§Jennifer E. Nyland PhD, \*Nazia T. Raja-Khan MD, Kerstin Bettermann MD, PhD, Philippe A. Haouzi MD, PhD,  
Douglas L. Leslie, PhD, Jennifer L. Kraschnewski MD, MPH, Leslie J. Parent MD & \*§Patricia Sue Grigson PhD

**Table of Contents**

**Page\***

|                                                                                                                                                                                         |   |
|-----------------------------------------------------------------------------------------------------------------------------------------------------------------------------------------|---|
| eTable 1: Current medications for all patients with T2DM with a COVID-19 diagnosis or positive SARS-CoV-2 test .....                                                                    | 2 |
| eTable 2: Current medications for No-G/D/P cohort with a COVID-19 diagnosis or positive SARS-CoV-2 test ....                                                                            | 3 |
| eTable 3: Current medications for patients with T2DM with a COVID-19 diagnosis or positive SARS-CoV-2 test by medication cohort .....                                                   | 4 |
| eTable 4: Laboratory values for hospitalized patients with a COVID-19 diagnosis or positive SARS-CoV-2 test at the time of admission and after hospitalization .....                    | 5 |
| eTable 5: Laboratory values at the time of admission and during hospitalization among patients who continued compared or discontinued specified medications after hospitalization ..... | 6 |

**eTable 1: Current medications for all patients with T2DM with a COVID-19 diagnosis or positive SARS-CoV-2 test**

|                                                 | All T2DM<br>(n=29,516) | Alive at<br>28 days <sup>a</sup><br>(n=27,595) | Deceased at<br>28 days<br>(n=1,921) | <i>P</i> |
|-------------------------------------------------|------------------------|------------------------------------------------|-------------------------------------|----------|
| <b>Current Medications<sup>b</sup>, No. (%)</b> |                        |                                                |                                     |          |
| Insulin                                         | 9,149 (31.0)           | 7,645 (27.7)                                   | 1,504 (78.3)                        | < .001   |
| Antihypoglycemics                               | 6,535 (22.1)           | 5,162 (18.7)                                   | 1,373 (71.5)                        | < .001   |
| Glucagon                                        | 3,401 (11.5)           | 2,635 (9.5)                                    | 766 (39.9)                          | < .001   |
| Glucose                                         | 6,443 (21.8)           | 5,071 (18.4)                                   | 1,372 (71.4)                        | < .001   |
| Oral hypoglycemic agents                        | 6,563 (22.2)           | 6,229 (22.6)                                   | 334 (17.4)                          | < .001   |
| Metformin                                       | 5,077 (17.2)           | 4,844 (17.6)                                   | 227 (11.8)                          | < .001   |
| Pioglitazone                                    | 300 (1.0)              | 291 (1.1)                                      | <10 (-)                             | -        |
| Acarbose                                        | 16 (0.1)               | 16 (0.1)                                       | 0 (0.0)                             | .33      |
| Repaglinide                                     | 51 (0.2)               | 51 (0.2)                                       | <10 (-)                             | -        |
| Hypoglycemic agents, other                      | 1,033 (3.5)            | 998 (3.6)                                      | 35 (1.8)                            | < .001   |
| Dulaglutide                                     | 557 (1.9)              | 538 (1.9)                                      | 19 (1)                              | .005     |
| Exenatide                                       | 84 (0.3)               | 84 (0.3)                                       | <10 (-)                             | -        |
| Liraglutide                                     | 300 (1.0)              | 300 (1.1)                                      | <10 (-)                             | -        |
| Lixisenatide                                    | 27 (0.1)               | 27 (0.1)                                       | <10 (-)                             | -        |
| Semaglutide                                     | 192 (0.7)              | 192 (0.7)                                      | <10 (-)                             | -        |
| Alogliptin                                      | 31 (0.1)               | 31 (0.1)                                       | <10 (-)                             | -        |
| Linagliptin                                     | 258 (0.9)              | 234 (0.8)                                      | 24 (1.2)                            | .14      |
| Saxagliptin                                     | 23 (0.1)               | 23 (0.1)                                       | <10 (-)                             | -        |
| Sitagliptin                                     | 745 (2.5)              | 685 (2.5)                                      | 60 (3.1)                            | .15      |
| Canagliflozin                                   | 129 (0.4)              | 129 (0.5)                                      | <10 (-)                             | -        |
| Dapagliflozin                                   | 149 (0.5)              | 149 (0.5)                                      | <10 (-)                             | -        |
| Empagliflozin                                   | 501 (1.7)              | 476 (1.7)                                      | 25 (1.3)                            | .09      |
| Ertugliflozin                                   | 13 (<0.1)              | 13 (<0.1)                                      | 0 (0.0)                             | .37      |
| Glimepiride                                     | 654 (2.2)              | 608 (2.2)                                      | 46 (2.4)                            | .37      |
| Glipizide                                       | 1,044 (3.5)            | 995 (3.6)                                      | 49 (2.6)                            | .03      |
| Glyburide                                       | 140 (0.5)              | 140 (0.5)                                      | <10 (-)                             | -        |
| Antihypertensive combinations                   | 129 (0.4)              | 116 (0.4)                                      | 13 (0.7)                            | .08      |
| Adrenal corticosteroids                         | 8,799 (29.8)           | 7,476 (27.1)                                   | 1,323 (68.9)                        | < .001   |
| Ace inhibitors                                  | 3,922 (13.3)           | 3,568 (12.9)                                   | 354 (18.4)                          | < .001   |
| Angiotensin II inhibitors                       | 2,955 (10.0)           | 2,690 (9.7)                                    | 265 (13.8)                          | < .001   |
| Antilipemic agents                              | 8,249 (27.9)           | 7,288 (26.4)                                   | 961 (50.0)                          | < .001   |

<sup>a</sup> Patients with the term “deceased” in the EMR within 28 days of a diagnosis of COVID-19 or positive test for SARS-CoV-2 were included in the “Deceased” group while all others were assigned to the “Alive” group.

<sup>b</sup> Medications listed in the EMR within 6 months up to the time of diagnosis of COVID-19 or positive test for SARS-CoV-2. *P* values indicate significance between “Alive” and “Deceased” groups.

**eTable 2: Current medications for No-G/D/P cohort with a COVID-19 diagnosis or positive SARS-CoV-2 test**

|                                                 | No-G/D/P <sup>a</sup><br>(n=23,714) | Alive at 28 days <sup>b</sup><br>(n=22,270) | Deceased at 28 days<br>(n=1,443) | <i>P</i> |
|-------------------------------------------------|-------------------------------------|---------------------------------------------|----------------------------------|----------|
| <b>Current Medications<sup>c</sup>, No. (%)</b> |                                     |                                             |                                  |          |
| Insulin                                         | 6,887 (29.0)                        | 5,800 (26.0)                                | 1,087 (75.3)                     | < .001   |
| Antihypoglycemics                               | 5,406 (22.8)                        | 4,419 (19.8)                                | 987 (68.4)                       | < .001   |
| Glucagon                                        | 2,904 (12.2)                        | 2,423 (10.9)                                | 481 (33.3)                       | < .001   |
| Glucose                                         | 5,325 (22.5)                        | 4,339 (19.5)                                | 986 (68.3)                       | < .001   |
| Oral hypoglycemic agents                        | 3,885 (16.4)                        | 3,716 (16.7)                                | 169 (11.7)                       | < .001   |
| Metformin                                       | 3,315 (14.0)                        | 3,180 (14.3)                                | 135 (9.4)                        | < .001   |
| Pioglitazone                                    | 0 (0.0)                             | 0 (0.0)                                     | 0 (0.0)                          | -        |
| Acarbose                                        | <10 (-)                             | <10 (-)                                     | 0 (0.0)                          | -        |
| Repaglinide                                     | 21 (0.1)                            | 21 (0.1)                                    | <10 (-)                          | -        |
| Hypoglycemic agents, other                      | <10 (-)                             | <10 (-)                                     | <10 (-)                          | -        |
| Dulaglutide                                     | 0 (0.0)                             | 0 (0.0)                                     | 0 (0.0)                          | -        |
| Exenatide                                       | 0 (0.0)                             | 0 (0.0)                                     | 0 (0.0)                          | -        |
| Liraglutide                                     | 0 (0.0)                             | 0 (0.0)                                     | 0 (0.0)                          | -        |
| Lixisenatide                                    | 0 (0.0)                             | 0 (0.0)                                     | 0 (0.0)                          | -        |
| Semaglutide                                     | 0 (0.0)                             | 0 (0.0)                                     | 0 (0.0)                          | -        |
| Alogliptin                                      | 0 (0.0)                             | 0 (0.0)                                     | 0 (0.0)                          | -        |
| Linagliptin                                     | 0 (0.0)                             | 0 (0.0)                                     | 0 (0.0)                          | -        |
| Saxagliptin                                     | 0 (0.0)                             | 0 (0.0)                                     | 0 (0.0)                          | -        |
| Sitagliptin                                     | 0 (0.0)                             | 0 (0.0)                                     | 0 (0.0)                          | -        |
| Canagliflozin                                   | 43 (0.2)                            | 43 (0.2)                                    | 0 (0.0)                          | .09      |
| Dapagliflozin                                   | 56 (0.2)                            | 56 (0.3)                                    | <10 (-)                          | -        |
| Empagliflozin                                   | 209 (0.9)                           | 198 (0.9)                                   | 11 (0.8)                         | .88      |
| Ertugliflozin                                   | <10 (-)                             | <10 (-)                                     | <10 (-)                          | -        |
| Glimepiride                                     | 342 (1.4)                           | 316 (1.4)                                   | 26 (1.8)                         | .20      |
| Glipizide                                       | 609 (2.6)                           | 580 (2.6)                                   | 29 (2.0)                         | .26      |
| Glyburide                                       | 88 (0.4)                            | 79 (0.4)                                    | <10 (-)                          | -        |
| Antihypertensive combinations                   | 102 (0.4)                           | 95 (0.4)                                    | <10 (-)                          | -        |
| Adrenal corticosteroids                         | 7,248 (30.6)                        | 6,284 (28.2)                                | 964 (66.8)                       | < .001   |
| Ace inhibitors                                  | 2,765 (11.7)                        | 2,519 (11.3)                                | 246 (17.0)                       | < .001   |
| Angiotensin II inhibitors                       | 2,077 (8.8)                         | 1,894 (8.5)                                 | 183 (12.6)                       | < .001   |
| Antilipemic agents                              | 5,886 (24.8)                        | 5,200 (23.3)                                | 686 (47.5%)                      | < .001   |

<sup>a</sup> The No-G/D/P cohort consisted of patients with T2DM with a diagnosis of COVID-19 or positive test for SARS-CoV-2 that did not have any GLP-1R agonists, DPP-4 inhibitors, or pioglitazone in the EMR.

<sup>b</sup> Patients with the term “deceased” in the EMR within 28 days of a diagnosis of COVID-19 or positive test for SARS-CoV-2 were included in the “Deceased” group while all others were assigned to the “Alive” group.

<sup>c</sup> Medications listed in the EMR within 6 months up to the time of diagnosis of COVID-19 or positive test for SARS-CoV-2.

*P* values indicate significance between “Alive” and “Deceased” groups.

**eTable 3: Current medications for patients with T2DM with a COVID-19 diagnosis or positive SARS-CoV-2 test by medication cohort**

|                                                 | No-G/D/P <sup>a</sup><br>(n=23,714) | GLP-1<br>(n=1,774) | <i>P</i> | DPP-4<br>(n=2,264) | <i>P</i> | Pioglitazone<br>(n=469) | <i>P</i> | Any Meds <sup>b</sup><br>(n=5,606) | <i>P</i> |
|-------------------------------------------------|-------------------------------------|--------------------|----------|--------------------|----------|-------------------------|----------|------------------------------------|----------|
| <b>Current Medications<sup>c</sup>, No. (%)</b> |                                     |                    |          |                    |          |                         |          |                                    |          |
| Insulin                                         | 6,877 (29.0)                        | 756 (42.6)         | < .001   | 937 (41.4)         | < .001   | 159 (33.9)              | .03      | 2,405 (42.9)                       | < .001   |
| Antihypoglycemics                               | 5,407 (22.8)                        | 373 (21.0)         | .07      | 616 (27.2)         | < .001   | 116 (24.7)              | .30      | 1,452 (25.9)                       | < .001   |
| Glucagon                                        | 2,893 (12.2)                        | 254 (14.3)         | .01      | 387 (17.1)         | < .001   | 71 (15.1)               | .05      | 975 (17.4)                         | < .001   |
| Glucose                                         | 5,336 (22.5)                        | 367 (20.7)         | .09      | 604 (26.7)         | < .001   | 114 (24.3)              | .32      | 1,435 (25.6)                       | < .001   |
| Oral hypoglycemic agents                        | 3,889 (16.4)                        | 742 (41.8)         | < .001   | 1,134 (50.1)       | < .001   | 220 (46.9)              | < .001   | 2,736 (48.8)                       | < .001   |
| Metformin                                       | 3,320 (14.0)                        | 608 (34.3)         | < .001   | 607 (26.8)         | < .001   | 136 (29.0)              | < .001   | 1,766 (31.5)                       | < .001   |
| Pioglitazone                                    | 0 (0.0)                             | 0 (0.0)            | -        | 0 (0.0)            | -        | 469 (100.0)             | < .001   | 1,009 (18.0)                       | < .001   |
| Repaglinide                                     | 24 (0.1)                            | <10 (-)            | -        | 18 (0.8)           | < .001   | <10 (-)                 | -        | 28 (0.5)                           | < .001   |
| Hypoglycemic agents, other                      | 0 (0.0)                             | 1,774 (100.0)      | < .001   | 0 (0.0)            | -        | 0 (0.0)                 | -        | 1,928 (34.4)                       | < .001   |
| Dulaglutide                                     | 0 (0.0)                             | 857 (48.3)         | < .001   | 0 (0.0)            | -        | 0 (0.0)                 | -        | 1,351 (24.1)                       | < .001   |
| Exenatide                                       | 0 (0.0)                             | 255 (14.4)         | < .001   | 0 (0.0)            | -        | 0 (0.0)                 | -        | 415 (7.4)                          | < .001   |
| Liraglutide                                     | 0 (0.0)                             | 786 (44.3)         | < .001   | 0 (0.0)            | -        | 0 (0.0)                 | -        | 1,177 (21.0)                       | < .001   |
| Lixisenatide                                    | 0 (0.0)                             | 43 (2.4)           | < .001   | 0 (0.0)            | -        | 0 (0.0)                 | -        | 73 (1.3)                           | < .001   |
| Semaglutide                                     | 0 (0.0)                             | 348 (19.6)         | < .001   | 0 (0.0)            | -        | 0 (0.0)                 | -        | 533 (9.5)                          | < .001   |
| Alogliptin                                      | 0 (0.0)                             | 0 (0.0)            | -        | 72 (3.2)           | < .001   | 0 (0.0)                 | -        | 118 (2.1)                          | < .001   |
| Linagliptin                                     | 0 (0.0)                             | 0 (0.0)            | -        | 675 (29.8)         | < .001   | 0 (0.0)                 | -        | 919 (16.4)                         | < .001   |
| Saxagliptin                                     | 0 (0.0)                             | 0 (0.0)            | -        | 97 (4.3)           | < .001   | 0 (0.0)                 | -        | 163 (2.9)                          | < .001   |
| Sitagliptin                                     | 0 (0.0)                             | 0 (0.0)            | -        | 1,795 (79.3)       | < .001   | 0 (0.0)                 | -        | 1,502 (26.8)                       | < .001   |
| Canagliflozin                                   | 47 (0.2)                            | 25 (1.4)           | < .001   | 25 (1.1)           | < .001   | <10 (-)                 | -        | 78 (1.4)                           | < .001   |
| Dapagliflozin                                   | 47 (0.2)                            | 39 (2.2)           | < .001   | 32 (1.4)           | < .001   | <10 (-)                 | -        | 107 (1.9)                          | < .001   |
| Empagliflozin                                   | 213 (0.9)                           | 124 (7.0)          | < .001   | 79 (3.5)           | < .001   | 18 (3.8)                | < .001   | 325 (5.8)                          | < .001   |
| Ertugliflozin                                   | <10 (-)                             | <10 (-)            | -        | <10 (-)            | -        | 0 (0.0)                 | -        | 11 (0.2)                           | -        |
| Glimepiride                                     | 332 (1.4)                           | 67 (3.8)           | < .001   | 111 (4.9)          | < .001   | 29 (6.2)                | < .001   | 314 (5.6)                          | < .001   |
| Glipizide                                       | 617 (2.6)                           | 99 (5.6)           | < .001   | 174 (7.7)          | < .001   | 49 (10.4)               | < .001   | 432 (7.7)                          | < .001   |
| Glyburide                                       | 95 (0.4)                            | 12 (0.7)           | .02      | 18 (0.8)           | .004     | <10 (-)                 | -        | 56 (1.0)                           | < .001   |
| Adrenal corticosteroids                         | 7,256 (30.6)                        | 600 (33.8)         | .005     | 765 (33.8)         | < .001   | 125 (26.7)              | .07      | 1,906 (34.0)                       | < .001   |
| Ace inhibitors                                  | 2,775 (11.7)                        | 353 (19.9)         | < .001   | 453 (20.0)         | < .001   | 100 (21.3)              | < .001   | 1,160 (20.7)                       | < .001   |
| Angiotensin II inhibitors                       | 2,087 (8.8)                         | 314 (17.7)         | < .001   | 358 (15.8)         | < .001   | 61 (13.0)               | < .001   | 953 (17.0)                         | < .001   |
| Antilipemic agents                              | 5,881 (24.8)                        | 766 (43.2)         | < .001   | 960 (42.4)         | < .001   | 193 (41.2)              | < .001   | 2,500 (44.6)                       | < .001   |
| Antihypertensive combinations                   | 95 (0.4)                            | 16 (0.9)           | .002     | <10 (-)            | -        | 0 (0.0)                 | .18      | 39 (0.7)                           | .02      |

<sup>a</sup> The “No-G/D/P” cohort consisted of patients with T2DM with a diagnosis of COVID-19 or positive test for SARS-CoV-2 that did not have any GLP-1R agonists, DPP-4 inhibitors, or pioglitazone in the EMR.

<sup>b</sup> The “Any Meds” cohort consisted of patients with T2DM with a diagnosis of COVID-19 or positive test for SARS-CoV-2 that had GLP-1R agonists, DPP-4 inhibitors, and/or pioglitazone in the EMR.

<sup>c</sup> Medications listed in the EMR within 6 months up to the time of diagnosis of COVID-19 or positive test for SARS-CoV-2.

*P* values indicate significance compared with the No-G/D/P cohort.

**eTable 4: Laboratory values for hospitalized patients with a COVID-19 diagnosis or positive SARS-CoV-2 test at the time of admission and after hospitalization**

|                                               | Before Propensity Matching |          | After Propensity Matching <sup>a</sup> |                        |          |
|-----------------------------------------------|----------------------------|----------|----------------------------------------|------------------------|----------|
|                                               | Mean (SD)                  | <i>P</i> | Matched<br>No-G/D/P Cohort             | Matched<br>Drug Cohort | <i>P</i> |
| <b>Blood Glucose, mean (SD), mg/dL</b>        |                            |          |                                        |                        |          |
| <b>At time of Admission<sup>b</sup></b>       |                            |          |                                        |                        |          |
| No-G/D/P <sup>d</sup>                         | 146.8 (64.9)               |          |                                        |                        |          |
| GLP-1                                         | 148.0 (55.8)               | .87      | 140.9 (50.9)                           | 148.0 (55.8)           | .33      |
| DPP-4                                         | 153.9 (64.6)               | .01      | 142.9 (64.7)                           | 158.9 (66.8)           | < .001   |
| Pioglitazone                                  | 143.6 (62.5)               | .64      | 139.4 (61.4)                           | 142.6 (66.0)           | .76      |
| Any Meds <sup>e</sup>                         | 153.6 (64.9)               | .002     | 142.7 (66.3)                           | 156.0 (68.1)           | < .001   |
| <b>After Hospitalization<sup>c</sup></b>      |                            |          |                                        |                        |          |
| No-G/D/P <sup>d</sup>                         | 140.7 (62.3)               |          |                                        |                        |          |
| GLP-1                                         | 142.3 (57.2)               | .81      | 147.7 (63.4)                           | 143.2 (61.9)           | .67      |
| DPP-4                                         | 153.2 (64.2)               | < .001   | 133.6 (55.5)                           | 157.0 (65.7)           | < .001   |
| Pioglitazone                                  | 153.4 (72.5)               | .05      | 141.1 (53.5)                           | 156.8 (77.1)           | .15      |
| Any Meds <sup>e</sup>                         | 153.0 (66.3)               | < .001   | 137.8 (58.5)                           | 156.7 (69.5)           | < .001   |
| <b>Hemoglobin A1c, mean (SD), %; mmol/mol</b> |                            |          |                                        |                        |          |
| <b>At time of Admission<sup>b</sup></b>       |                            |          |                                        |                        |          |
| No-G/D/P <sup>d</sup>                         | 8.4 (2.4); 68 (26.2)       |          |                                        |                        |          |
| GLP-1                                         | 8.3 (2.1); 67 (23)         | .88      | 8.4 (2.3); 68 (25.1)                   | 8.3 (2.1); 67 (23)     | .96      |
| DPP-4                                         | 8.2 (2.2); 66 (24)         | .29      | 8.0 (2.3); 64 (25.1)                   | 8.2 (2.2); 66 (24)     | .38      |
| Pioglitazone                                  | 7.7 (1.7); 61 (18.6)       | .11      | 7.1 (1.3); 54 (14.2)                   | 7.5 (1.7); 58 (18.6)   | .40      |
| Any Meds <sup>e</sup>                         | 8.4 (2.2); 68 (24)         | .90      | 7.9 (2.2); 63 (24)                     | 8.3 (2.2); 67 (24)     | .03      |
| <b>After Hospitalization<sup>c</sup></b>      |                            |          |                                        |                        |          |
| No-G/D/P <sup>d</sup>                         | 8.3 (2.4); 67 (26.2)       |          |                                        |                        |          |
| GLP-1                                         | 8.1 (2.0); 65 (21.9)       | .65      | 8.0 (2.1); 64 (23)                     | 8.2 (2.1); 66 (23)     | .77      |
| DPP-4                                         | 8.2 (2.2); 66 (24)         | .50      | 7.8 (2.2); 62 (24)                     | 8.2 (2.1); 66 (23)     | .04      |
| Pioglitazone                                  | 7.8 (1.6); 62 (17.5)       | .17      | 8.0 (2.2); 64 (24)                     | 7.6 (1.6); 60 (17.5)   | .48      |
| Any Meds <sup>e</sup>                         | 8.4 (2.1); 68 (23)         | .49      | 7.9 (2.2); 63 (24)                     | 8.3 (2.2); 67 (24)     | .02      |
| <b>Oxygen Saturation, mean (SD), %</b>        |                            |          |                                        |                        |          |
| <b>At time of Admission<sup>b</sup></b>       |                            |          |                                        |                        |          |
| No-G/D/P <sup>d</sup>                         | 85.6 (19.2)                |          |                                        |                        |          |
| GLP-1                                         | 85.1 (18.6)                | .87      | 88.9 (14.6)                            | 85.1 (18.6)            | .27      |
| DPP-4                                         | 87.0 (18.7)                | .28      | 88.0 (17.0)                            | 87.6 (18.8)            | .80      |
| Pioglitazone                                  | 83.0 (21.0)                | .37      | 80.8 (24.6)                            | 80.9 (22.2)            | .97      |
| Any Meds <sup>e</sup>                         | 85.5 (19.7)                | .89      | 87.0 (19.0)                            | 85.6 (20.2)            | .33      |
| <b>After Hospitalization<sup>c</sup></b>      |                            |          |                                        |                        |          |
| No-G/D/P <sup>d</sup>                         | 85.4 (19.2)                |          |                                        |                        |          |
| GLP-1                                         | 86.0 (22.0)                | .84      | 88.1 (14.9)                            | 86.0 (23.8)            | .63      |
| DPP-4                                         | 86.6 (18.6)                | .28      | 85.0 (19.3)                            | 87.1 (18.8)            | .23      |
| Pioglitazone                                  | 84.4 (19.9)                | .71      | 85.6 (20.3)                            | 83.5 (20.7)            | .67      |
| Any Meds <sup>e</sup>                         | 85.9 (19.0)                | .57      | 86.3 (19.9)                            | 87.0 (18.0)            | .64      |

<sup>a</sup> Propensity matching balanced cohorts according to age, sex, race, ethnicity, BMI, and the presence of essential (primary) hypertension; ischemic heart disease; cerebrovascular disease; heart failure; chronic kidney disease; or overweight and obesity in the EMR within 6 months prior to COVID-19 diagnosis.

<sup>b</sup> Values are the latest available record occurring following diagnosis of COVID-19 or positive test for SARS-CoV-2 up to 28 days after.

<sup>c</sup> Values are the latest available record occurring two days prior up to and including the day of hospitalization.

<sup>d</sup> The “No-G/D/P” cohort consisted of patients with T2DM with a diagnosis of COVID-19 or positive test for SARS-CoV-2 that did not have any GLP-1R agonists, DPP-4 inhibitors, or pioglitazone in the EMR.

<sup>e</sup> The “Any Meds” cohort consisted of patients with T2DM with a diagnosis of COVID-19 or positive test for SARS-CoV-2 that had GLP-1R agonists, DPP-4 inhibitors, and/or pioglitazone in the EMR.

*P* values indicate significance compared with the No-G/D/P cohort.

**eTable 5: Laboratory values at the time of admission and during hospitalization among patients who continued compared or discontinued specified medications after hospitalization**

|                                               | Prior to Propensity Matching |                      |          | After Propensity Matching <sup>a</sup> |                      |          |
|-----------------------------------------------|------------------------------|----------------------|----------|----------------------------------------|----------------------|----------|
|                                               | Continued <sup>b</sup>       | Discontinued         | <i>P</i> | Continued                              | Discontinued         | <i>P</i> |
| <b>Blood Glucose, mean (SD), mg/dL</b>        |                              |                      |          |                                        |                      |          |
| <b>At time of Admission<sup>c</sup></b>       |                              |                      |          |                                        |                      |          |
| No-G/D/P <sup>e</sup>                         | 144.9 (63.2)                 | -                    | -        | -                                      | -                    | -        |
| GLP-1                                         | 145.5 (49.9)                 | 155.0 (68.8)         | .31      | 147.5 (55.1)                           | 153.3 (67.5)         | .69      |
| DPP-4                                         | 157.8 (61.2)                 | 148.0 (62.2)         | .07      | 154.6 (60.0)                           | 146.8 (60.9)         | .21      |
| Pioglitazone                                  | 167.7 (66.9)                 | 131.9 (57.4)         | .009     | 172.3 (71.3)                           | 132.7 (47.8)         | .02      |
| Any Meds <sup>f</sup>                         | 153.2 (59.3)                 | 150.4 (64.8)         | .50      | 156.9 (61.7)                           | 154.7 (65.7)         | .70      |
| <b>After Hospitalization<sup>d</sup></b>      |                              |                      |          |                                        |                      |          |
| No-G/D/P <sup>e</sup>                         | 139.9 (62.4)                 | -                    | -        | -                                      | -                    | -        |
| GLP-1                                         | 135.1 (50.3)                 | 156.0 (67.8)         | .02      | 136.6 (51.7)                           | 151.0 (65.4)         | .20      |
| DPP-4                                         | 153.7 (71.2)                 | 152.7 (61.6)         | .86      | 152.6 (71.3)                           | 152.6 (62.6)         | .99      |
| Pioglitazone                                  | 161.3 (69.8)                 | 149.3 (75.8)         | .47      | 158.0 (57.1)                           | 139.1 (71.3)         | .34      |
| Any Meds <sup>f</sup>                         | 148.5 (66.9)                 | 153.7 (65.1)         | .21      | 148.5 (67.1)                           | 152.2 (61.6)         | .42      |
| <b>Hemoglobin A1c, mean (SD), %; mmol/mol</b> |                              |                      |          |                                        |                      |          |
| <b>At time of Admission<sup>c</sup></b>       |                              |                      |          |                                        |                      |          |
| No-G/D/P <sup>e</sup>                         | 8.5 (2.5); 69 (27.3)         | -                    | -        | -                                      | -                    | -        |
| GLP-1                                         | 8.6 (2.3); 70 (25.1)         | 8.7 (2.3); 72 (25.1) | .88      | 8.2 (2.4); 66 (26.2)                   | 7.8 (1.8); 62 (19.7) | .69      |
| DPP-4                                         | 8.1 (2.1); 65 (23)           | 8.1 (2.2); 65 (24)   | .96      | 8.2 (2.2); 66 (24)                     | 8.0 (2.2); 64 (24)   | .66      |
| Pioglitazone                                  | 8.4 (1.7); 68 (18.6)         | 7.2 (1.6); 55 (17.5) | .07      | 8.1 (1.7); 65 (18.6)                   | 6.9 (1.8); 52 (19.7) | .23      |
| Any Meds <sup>f</sup>                         | 8.3 (2.1); 67 (23)           | 8.3 (2.2); 67 (24)   | .77      | 8.2 (2.1); 66 (23)                     | 8.5 (2.2); 69 (24)   | .35      |
| <b>After Hospitalization<sup>d</sup></b>      |                              |                      |          |                                        |                      |          |
| No-G/D/P <sup>e</sup>                         | 8.3 (2.4); 67 (26.2)         | -                    | -        | -                                      | -                    | -        |
| GLP-1                                         | 8.4 (2.1); 68 (23)           | 8.9 (2.5); 74 (27.3) | .36      | 8.4 (2.0); 68 (21.9)                   | 9.1 (2.5); 76 (27.3) | .24      |
| DPP-4                                         | 8.2 (2.1); 66 (23)           | 8.0 (2.1); 64 (23)   | .59      | 8.1 (2.1); 65 (23)                     | 8.1 (2.1); 65 (23)   | .94      |
| Pioglitazone                                  | 8.4 (1.6); 68 (17.5)         | 7.3 (1.5); 56 (16.4) | .05      | 8.5 (2.0); 69 (21.9)                   | 6.9 (1.6); 52 (17.5) | .07      |
| Any Meds <sup>f</sup>                         | 8.3 (2.0); 67 (21.9)         | 8.2 (2.2); 66 (24)   | .65      | 8.3 (2.1); 67 (23)                     | 8.4 (2.1); 68 (23)   | .83      |
| <b>Oxygen Saturation, mean (SD), %</b>        |                              |                      |          |                                        |                      |          |
| <b>At time of Admission<sup>c</sup></b>       |                              |                      |          |                                        |                      |          |
| No-G/D/P <sup>e</sup>                         | 85.5 (19.1)                  | -                    | -        | -                                      | -                    | -        |
| GLP-1                                         | 85.4 (19.7)                  | 83.3 (22.4)          | .64      | 84.4 (20.7)                            | 83.8 (24.3)          | .94      |
| DPP-4                                         | 90.8 (13.9)                  | 86.0 (19.7)          | .05      | 90.8 (14.3)                            | 87.6 (18.7)          | .23      |
| Pioglitazone                                  | 84.2 (20.2)                  | 82.8 (18.9)          | .83      | 86.0 (20.4)                            | 82.5 (20.2)          | .69      |
| Any Meds <sup>f</sup>                         | 87.9 (17.2)                  | 85.2 (19.8)          | .15      | 88.8 (17.2)                            | 84.0 (21.1)          | .06      |
| <b>After Hospitalization<sup>d</sup></b>      |                              |                      |          |                                        |                      |          |
| No-G/D/P <sup>e</sup>                         | 85.1 (19.2)                  | -                    | -        | -                                      | -                    | -        |
| GLP-1                                         | 85.0 (23.1)                  | 84.5 (20.0)          | .92      | 85.6 (22.8)                            | 85.7 (20.6)          | .99      |
| DPP-4                                         | 91.5 (14.1)                  | 84.4 (20.5)          | .003     | 91.4 (14.6)                            | 85.2 (18.8)          | .01      |
| Pioglitazone                                  | 87.1 (14.0)                  | 84.5 (19.5)          | .67      | 86.4 (16.4)                            | 84.9 (21.6)          | .85      |
| Any Meds <sup>f</sup>                         | 88.2 (17.9)                  | 85.3 (19.3)          | .09      | 88.1 (18.0)                            | 85.3 (19.5)          | .14      |

<sup>a</sup> Propensity matching balanced cohorts according to age, sex, race, ethnicity, BMI, and the presence of essential (primary) hypertension; ischemic heart disease; cerebrovascular disease; heart failure; chronic kidney disease; or overweight and obesity in the EMR within 6 months prior to COVID-19 diagnosis.

<sup>b</sup> Patients with the specified medication listed in the EMR after hospitalization within 28 days of a diagnosis of COVID-19 or positive test for SARS-CoV-2 were included in the “Continued” group while those without the specified medications were assigned to the “Discontinued” group.

<sup>c</sup> Values are the latest available record occurring following diagnosis of COVID-19 or positive test for SARS-CoV-2 up to 28 days after.

<sup>d</sup> Values are the latest available record occurring two days prior up to and including the day of hospitalization.

<sup>e</sup> The “No-G/D/P” cohort consisted of patients with T2DM with a diagnosis of COVID-19 or positive test for SARS-CoV-2 that did not have any GLP-1R agonists, DPP-4 inhibitors, or pioglitazone in the EMR.

<sup>f</sup> The “Any Meds” cohort consisted of patients with T2DM with a diagnosis of COVID-19 or positive test for SARS-CoV-2 that had GLP-1R agonists, DPP-4 inhibitors, and/or pioglitazone in the EMR.

*P* values indicate significance between “Continued” and “Discontinued” groups.
